# Supplementary material
Source: PubMed Central journal article supplement (PMC3505254)
Supplement: NIHMS397393-supplement-Supplementary_Data.pdf [file NIHMS397393-supplement-Supplementary_Data.pdf]

*Supporting Information*

# **Molecular Dynamics Trajectory Compression with a Coarse-Grained Model**

Yi-Ming Cheng<sup>1</sup>, Srinivasa Murthy Gopal<sup>1</sup>, Sean M. Law,<sup>1</sup>Michael Feig<sup>1,2\*</sup>

<sup>1</sup>*Department of Biochemistry and Molecular Biology*

<sup>2</sup>*Department of Chemistry*

*Michigan State University, East Lansing MI, USA*

\*corresponding author: feig@msu.edu, (517) 432-7439

**Table S1:** Bond distances, angles, and dihedrals used in PRIMO protein reconstructions. The constructed and constrained atoms correspond to atoms A, B, C and D respectively as discussed in the original PRIMO paper[1]. All parameters are obtained from all atom explicit solvent simulations of dipeptides with the CHARMM force field[2, 3].

| Residue  | Constructed Atom                     | Constrained Atoms/ CG Sites                                      | Bond Length (Å) | Bond Angle (degree) | Dihedral (degree) |
|----------|--------------------------------------|------------------------------------------------------------------|-----------------|---------------------|-------------------|
| Backbone | C <sup>i</sup>                       | CO <sup>i</sup> , N <sup>i+1</sup> , C <sub>α</sub> <sup>i</sup> | 0.616           | 41.50               | 0.00              |
| Arg      | C <sub>β</sub>                       | C <sub>α</sub> , N, C                                            | 1.542           | 110.60              | -120.95           |
| Asn      | C <sub>γ</sub>                       | SC2, SC3, C <sub>β</sub>                                         | 0.616           | 41.50               | 0.20              |
| Cys      | C <sub>β</sub>                       | C <sub>α</sub> , N, C                                            | 1.556           | 110.45              | -122.35           |
| Gln      | C <sub>β</sub>                       | C <sub>α</sub> , N, C                                            | 1.559           | 110.75              | -121.90           |
|          | C <sub>δ</sub>                       | SC2, SC3, C <sub>γ</sub>                                         | 0.616           | 40.15               | 1.50              |
| Glu      | C <sub>β</sub>                       | C <sub>α</sub> , N, C                                            | 1.553           | 111.20              | -123.60           |
| His      | C <sub>β</sub>                       | C <sub>α</sub> , N, C                                            | 1.543           | 111.10              | -122.5            |
|          | C <sub>ε1</sub>                      | SC3, SC2, C <sub>γ</sub>                                         | 1.323           | 34.65               | 179.5             |
|          | C <sub>δ2</sub>                      | SC3, SC2, C <sub>γ</sub>                                         | 1.386           | 70.25               | 0.3               |
| Leu      | C <sub>γ</sub>                       | C <sub>β</sub> , SC2, SC3                                        | 1.543           | 21.65               | -30.15            |
| Lys      | C <sub>β</sub>                       | C <sub>α</sub> , N, C                                            | 1.555           | 110.20              | -122.95           |
| Met      | C <sub>β</sub>                       | C <sub>α</sub> , N, C                                            | 1.551           | 109.90              | -123.80           |
| Phe      | C <sub>β</sub>                       | C <sub>α</sub> , N, C                                            | 1.559           | 110.95              | -122.15           |
|          | C <sub>δ1</sub>                      | SC2, SC3, C <sub>γ</sub>                                         | 1.396           | 90.15               | 0.55              |
|          | C <sub>δ2</sub>                      | SC3, SC2, C <sub>γ</sub>                                         | 1.400           | 89.80               | 0.15              |
|          | C <sub>ζ</sub>                       | SC3, C <sub>δ2</sub> , C <sub>γ</sub>                            | 1.401           | 119.60              | -0.05             |
| Tyr      | C <sub>β</sub>                       | C <sub>α</sub> , N, C                                            | 1.558           | 110.95              | -122.95           |
|          | C <sub>δ1</sub>                      | SC2, SC3, C <sub>γ</sub>                                         | 1.407           | 90.40               | 0.10              |
|          | C <sub>δ2</sub>                      | SC3, SC2, C <sub>γ</sub>                                         | 1.396           | 90.15               | -0.05             |
|          | C <sub>ζ</sub>                       | SC3, C <sub>δ2</sub> , C <sub>γ</sub>                            | 1.400           | 119.65              | 1.00              |
| Pro      | C <sub>β</sub>                       | C <sub>α</sub> , N, C                                            | 1.540           | 103.20              | -122.05           |
|          | C <sub>δ</sub> ( <i>non N-term</i> ) | N <sup>i</sup> , C <sub>α</sub> <sup>i</sup> , C <sup>i-1</sup>  | 1.464           | 111.60              | 178.70            |
|          | C <sub>δ</sub> ( <i>N-term</i> )     | N, C <sub>α</sub> , C <sub>β</sub>                               | 1.460           | 111.60              | 12.20             |
| Ser      | C <sub>β</sub>                       | C <sub>α</sub> , N, C                                            | 1.544           | 112.60              | -120.80           |
| Thr      | C <sub>β</sub>                       | C <sub>α</sub> , SC1, SC2                                        | 1.523           | 20.25               | 44.2              |
| Trp      | C <sub>β</sub>                       | C <sub>α</sub> , N, C                                            | 1.557           | 109.75              | -123.50           |
|          | C <sub>δ2</sub>                      | SC3, SC4, SC2                                                    | 1.403           | 59.75               | -0.25             |
|          | C <sub>ε2</sub>                      | SC2, SC4, SC3                                                    | 1.357           | 25.25               | 0.10              |
|          | C <sub>δ1</sub>                      | SC2, C <sub>ε2</sub> , C <sub>δ2</sub>                           | 1.377           | 109.95              | 0.15              |
|          | C <sub>ζ3</sub>                      | SC3, C <sub>δ2</sub> , C <sub>ε2</sub>                           | 1.394           | 118.30              | 2.15              |
|          | C <sub>η2</sub>                      | SC4, C <sub>ε2</sub> , C <sub>δ2</sub>                           | 1.396           | 117.40              | 1.95              |
| Val      | C <sub>β</sub>                       | C <sub>α</sub> , SC1, SC2                                        | 1.530           | 22.05               | -30.65            |

**Table S2:** Bond distances, angles, and dihedrals used in hydrogen atom reconstructions. The constructed and constrained atoms correspond to atoms A, B, C and D respectively as discussed in the original PRIMO paper[1]. All parameters are obtained from all atom explicit solvent simulations of dipeptides with the CHARMM force field[2, 3].

| Residue                  | Constructed Atom | Constrained Atoms/ CG Sites                         | Bond Length (Å) | Bond angle (degree) | Dihedral (degree) |
|--------------------------|------------------|-----------------------------------------------------|-----------------|---------------------|-------------------|
| backbone                 | H <sub>N</sub>   | N, C <sub>α</sub> , C <sup>i-1</sup>                | 0.997           | 116.0               | -178.6            |
|                          | H <sub>α</sub>   | C <sub>α</sub> , N, C                               | 1.080           | 109.0               | 117.0             |
| N-terminus               | H <sub>T1</sub>  | N, CA, C                                            | 0.997           | 109.5               | 52.5              |
|                          | H <sub>T2</sub>  | N, CA, C                                            | 0.997           | 109.5               | -64.9             |
|                          | H <sub>T3</sub>  | N, CA, C                                            | 0.997           | 109.5               | 174.7             |
| Acetylated N-terminus    | H <sub>y1</sub>  | C <sub>αy</sub> , C <sub>y</sub> , O <sub>y</sub>   | 1.111           | 110.1               | 180.0             |
|                          | H <sub>y2</sub>  | C <sub>αy</sub> , H <sub>y1</sub> , C <sub>y</sub>  | 1.111           | 108.4               | 120.0             |
|                          | H <sub>y3</sub>  | C <sub>αy</sub> , H <sub>y1</sub> , H <sub>y2</sub> | 1.111           | 108.4               | 115.5             |
| N-methylamide C-terminus | H <sub>NT</sub>  | N <sub>T</sub> , C <sub>αT</sub> , C                | 0.997           | 116.0               | -178.6            |
|                          | H <sub>T1</sub>  | C <sub>αT</sub> , N, HN <sub>T</sub>                | 1.111           | 110.1               | 180.0             |
|                          | H <sub>T2</sub>  | C <sub>αT</sub> , H <sub>T1</sub> , N               | 1.111           | 108.4               | 120.0             |
|                          | H <sub>T3</sub>  | C <sub>αT</sub> , H <sub>T1</sub> , H <sub>T2</sub> | 1.111           | 108.4               | 115.5             |
| Gly                      | H <sub>α1</sub>  | C <sub>α</sub> , C, N                               | 1.080           | 109.0               | 117.0             |
|                          | H <sub>α2</sub>  | C <sub>α</sub> , N, C                               | 1.080           | 109.0               | 117.0             |
| Ala                      | H <sub>β1</sub>  | C <sub>β</sub> , C <sub>α</sub> , N                 | 1.111           | 111.3               | 60.9              |
|                          | H <sub>β2</sub>  | C <sub>β</sub> , H <sub>β1</sub> , C <sub>α</sub>   | 1.111           | 107.3               | 120.6             |
|                          | H <sub>β3</sub>  | C <sub>β</sub> , H <sub>β1</sub> , H <sub>β2</sub>  | 1.111           | 107.9               | 115.5             |
| Arg                      | H <sub>β1</sub>  | C <sub>β</sub> , C <sub>γ</sub> , C <sub>α</sub>    | 1.111           | 108.1               | 123.0             |
|                          | H <sub>β2</sub>  | C <sub>β</sub> , C <sub>α</sub> , C <sub>γ</sub>    | 1.111           | 108.9               | 121.1             |
|                          | H <sub>γ1</sub>  | C <sub>γ</sub> , C <sub>δ</sub> , C <sub>β</sub>    | 1.111           | 107.1               | 121.8             |
|                          | H <sub>γ2</sub>  | C <sub>γ</sub> , C <sub>β</sub> , C <sub>δ</sub>    | 1.111           | 108.3               | 119.4             |
|                          | H <sub>δ1</sub>  | C <sub>δ</sub> , N <sub>ε</sub> , C <sub>γ</sub>    | 1.111           | 110.8               | 119.0             |
|                          | H <sub>δ2</sub>  | C <sub>δ</sub> , C <sub>γ</sub> , N <sub>ε</sub>    | 1.111           | 111.3               | 118.7             |
|                          | H <sub>ε</sub>   | N <sub>ε</sub> , C <sub>δ</sub> , C <sub>ζ</sub>    | 0.997           | 116.0               | -178.6            |
|                          | H <sub>η11</sub> | NH <sub>1</sub> , C <sub>ζ</sub> , N <sub>ε</sub>   | 1.000           | 116.9               | 2.6               |
|                          | H <sub>η12</sub> | NH <sub>1</sub> , C <sub>ζ</sub> , H <sub>η11</sub> | 1.000           | 118.3               | -176.4            |
|                          | H <sub>η21</sub> | NH <sub>2</sub> , C <sub>ζ</sub> , N <sub>ε</sub>   | 1.000           | 119.2               | -0.3              |
|                          | H <sub>η22</sub> | NH <sub>2</sub> , H <sub>η21</sub> , C <sub>ζ</sub> | 1.000           | 119.3               | -178.2            |
| Asn                      | H <sub>β1</sub>  | C <sub>β</sub> , C <sub>γ</sub> , C <sub>α</sub>    | 1.111           | 107.5               | 119.9             |
|                          | H <sub>β2</sub>  | C <sub>β</sub> , C <sub>α</sub> , C <sub>γ</sub>    | 1.111           | 109.8               | 120.2             |
|                          | H <sub>δ21</sub> | N <sub>δ2</sub> , C <sub>γ</sub> , O <sub>δ1</sub>  | 1.000           | 117.6               | -0.7              |
|                          | H <sub>δ22</sub> | N <sub>δ2</sub> , H <sub>δ21</sub> , C <sub>γ</sub> | 1.000           | 121.0               | -178.1            |
| Asp                      | H <sub>β1</sub>  | C <sub>β</sub> , C <sub>γ</sub> , C <sub>α</sub>    | 1.111           | 108.3               | 121.0             |
|                          | H <sub>β2</sub>  | C <sub>β</sub> , C <sub>α</sub> , C <sub>γ</sub>    | 1.111           | 108.6               | 120.1             |
| Cys                      | H <sub>β1</sub>  | C <sub>β</sub> , S <sub>γ</sub> , C <sub>α</sub>    | 1.111           | 109.3               | 122.1             |
|                          | H <sub>β2</sub>  | C <sub>β</sub> , C <sub>α</sub> , S <sub>γ</sub>    | 1.111           | 109.5               | 121.7             |
|                          | H <sub>γ1</sub>  | S <sub>γ</sub> , C <sub>β</sub> , C <sub>α</sub>    | 1.330           | 96.2                | 180.0             |
| Gln                      | H <sub>β1</sub>  | C <sub>β</sub> , C <sub>γ</sub> , C <sub>α</sub>    | 1.111           | 107.2               | 121.5             |

|                  |                                                   |                                                       |       |       |        |
|------------------|---------------------------------------------------|-------------------------------------------------------|-------|-------|--------|
|                  | H <sub>β2</sub>                                   | C <sub>β</sub> , C <sub>α</sub> , C <sub>γ</sub>      | 1.111 | 108.0 | 123.2  |
|                  | H <sub>γ1</sub>                                   | C <sub>γ</sub> , C <sub>δ</sub> , C <sub>β</sub>      | 1.111 | 108.5 | 121.9  |
|                  | H <sub>γ2</sub>                                   | C <sub>γ</sub> , C <sub>β</sub> , C <sub>δ</sub>      | 1.111 | 109.8 | 120.0  |
|                  | H <sub>ε22</sub>                                  | N <sub>ε2</sub> , C <sub>δ</sub> , O <sub>ε1</sub>    | 1.000 | 118.4 | -177.9 |
|                  | H <sub>ε21</sub>                                  | N <sub>ε2</sub> , H <sub>ε22</sub> , C <sub>δ</sub>   | 1.000 | 120.9 | 170.4  |
| Glu              | H <sub>β1</sub>                                   | C <sub>β</sub> , C <sub>γ</sub> , C <sub>α</sub>      | 1.111 | 107.9 | 120.8  |
|                  | H <sub>β2</sub>                                   | C <sub>β</sub> , C <sub>α</sub> , C <sub>γ</sub>      | 1.111 | 109.2 | 121.6  |
|                  | H <sub>γ1</sub>                                   | C <sub>γ</sub> , C <sub>δ</sub> , C <sub>β</sub>      | 1.111 | 108.4 | 122.4  |
|                  | H <sub>γ2</sub>                                   | C <sub>γ</sub> , C <sub>β</sub> , C <sub>δ</sub>      | 1.111 | 110.5 | 120.0  |
| His              | H <sub>β1</sub>                                   | C <sub>β</sub> , C <sub>γ</sub> , C <sub>α</sub>      | 1.111 | 108.6 | 122.7  |
|                  | H <sub>β2</sub>                                   | C <sub>β</sub> , C <sub>α</sub> , C <sub>γ</sub>      | 1.111 | 107.8 | 119.8  |
|                  | H <sub>δ2</sub>                                   | C <sub>δ2</sub> , N <sub>ε2</sub> , C <sub>γ</sub>    | 1.080 | 120.7 | -177.9 |
|                  | H <sub>ε1</sub>                                   | C <sub>ε1</sub> , N <sub>δ1</sub> , N <sub>ε2</sub>   | 1.080 | 123.5 | -179.6 |
| Ile              | H <sub>β</sub>                                    | C <sub>β</sub> , C <sub>γ1</sub> , C <sub>γ2</sub>    | 1.111 | 106.5 | 116.8  |
|                  | H <sub>γ21</sub>                                  | C <sub>γ2</sub> , C <sub>β</sub> , C <sub>α</sub>     | 1.111 | 111.2 | 64.5   |
|                  | H <sub>γ22</sub>                                  | C <sub>γ2</sub> , H <sub>γ21</sub> , C <sub>β</sub>   | 1.111 | 106.6 | 121.2  |
|                  | H <sub>γ23</sub>                                  | C <sub>γ2</sub> , H <sub>γ21</sub> , H <sub>γ22</sub> | 1.111 | 106.3 | 115.8  |
|                  | H <sub>δ1</sub>                                   | C <sub>δ</sub> , C <sub>γ1</sub> , C <sub>β</sub>     | 1.111 | 110.4 | 59.6   |
|                  | H <sub>δ2</sub>                                   | C <sub>δ</sub> , H <sub>δ1</sub> , C <sub>γ1</sub>    | 1.111 | 107.3 | 120.0  |
|                  | H <sub>δ3</sub>                                   | C <sub>δ</sub> , H <sub>δ1</sub> , H <sub>δ2</sub>    | 1.111 | 108.2 | 116.6  |
|                  | H <sub>γ11</sub>                                  | C <sub>γ1</sub> , C <sub>δ</sub> , C <sub>β</sub>     | 1.111 | 108.1 | 123.2  |
| H <sub>γ12</sub> | C <sub>γ1</sub> , C <sub>β</sub> , C <sub>δ</sub> | 1.111                                                 | 109.4 | 121.8 |        |
| Leu              | H <sub>β1</sub>                                   | C <sub>β</sub> , C <sub>γ</sub> , C <sub>α</sub>      | 1.111 | 107.5 | 121.1  |
|                  | H <sub>β2</sub>                                   | C <sub>β</sub> , C <sub>α</sub> , C <sub>γ</sub>      | 1.111 | 107.1 | 122.6  |
|                  | H <sub>γ</sub>                                    | C <sub>γ</sub> , C <sub>δ1</sub> , C <sub>δ2</sub>    | 1.111 | 107.3 | -116.4 |
|                  | H <sub>δ11</sub>                                  | C <sub>δ1</sub> , C <sub>γ</sub> , C <sub>β</sub>     | 1.111 | 110.6 | 59.1   |
|                  | H <sub>δ12</sub>                                  | C <sub>δ1</sub> , H <sub>δ11</sub> , C <sub>γ</sub>   | 1.111 | 108.8 | 120.8  |
|                  | H <sub>δ13</sub>                                  | C <sub>δ1</sub> , H <sub>δ11</sub> , H <sub>δ12</sub> | 1.111 | 108.6 | 118.3  |
|                  | H <sub>δ21</sub>                                  | C <sub>δ2</sub> , C <sub>γ</sub> , C <sub>β</sub>     | 1.111 | 110.0 | 63.2   |
|                  | H <sub>δ22</sub>                                  | C <sub>δ2</sub> , H <sub>δ21</sub> , C <sub>γ</sub>   | 1.111 | 109.2 | 120.8  |
|                  | H <sub>δ23</sub>                                  | C <sub>δ2</sub> , H <sub>δ21</sub> , H <sub>δ22</sub> | 1.111 | 107.9 | 117.6  |
| Lys              | H <sub>β1</sub>                                   | C <sub>β</sub> , C <sub>γ</sub> , C <sub>α</sub>      | 1.111 | 107.4 | 121.5  |
|                  | H <sub>β2</sub>                                   | C <sub>β</sub> , C <sub>α</sub> , C <sub>γ</sub>      | 1.111 | 109.2 | 120.5  |
|                  | H <sub>γ1</sub>                                   | C <sub>γ</sub> , C <sub>δ</sub> , C <sub>β</sub>      | 1.111 | 109.7 | 120.2  |
|                  | H <sub>γ2</sub>                                   | C <sub>γ</sub> , C <sub>β</sub> , C <sub>δ</sub>      | 1.111 | 108.6 | 121.6  |
|                  | H <sub>δ1</sub>                                   | C <sub>δ</sub> , C <sub>ε</sub> , C <sub>γ</sub>      | 1.111 | 108.3 | 121.2  |
|                  | H <sub>δ2</sub>                                   | C <sub>δ</sub> , C <sub>γ</sub> , C <sub>ε</sub>      | 1.111 | 109.1 | 121.4  |
|                  | H <sub>ε1</sub>                                   | C <sub>ε</sub> , N <sub>ζ</sub> , C <sub>δ</sub>      | 1.111 | 107.2 | 120.6  |
|                  | H <sub>ε2</sub>                                   | C <sub>ε</sub> , C <sub>δ</sub> , N <sub>ζ</sub>      | 1.111 | 110.6 | 119.2  |
|                  | H <sub>ζ1</sub>                                   | N <sub>ζ</sub> , C <sub>ε</sub> , C <sub>δ</sub>      | 1.111 | 110.2 | 62.3   |
|                  | H <sub>ζ2</sub>                                   | N <sub>ζ</sub> , H <sub>ζ1</sub> , C <sub>ε</sub>     | 1.111 | 108.5 | 121.0  |
|                  | H <sub>ζ3</sub>                                   | N <sub>ζ</sub> , H <sub>ζ1</sub> , H <sub>ζ2</sub>    | 1.111 | 108.7 | 117.3  |
| Met              | H <sub>β1</sub>                                   | C <sub>β</sub> , C <sub>γ</sub> , C <sub>α</sub>      | 1.111 | 109.1 | 120.9  |
|                  | H <sub>β2</sub>                                   | C <sub>β</sub> , C <sub>α</sub> , C <sub>γ</sub>      | 1.111 | 108.4 | 120.8  |
|                  | H <sub>γ1</sub>                                   | C <sub>γ</sub> , S <sub>δ</sub> , C <sub>β</sub>      | 1.111 | 108.6 | 122.2  |
|                  | H <sub>γ2</sub>                                   | C <sub>γ</sub> , C <sub>β</sub> , S <sub>δ</sub>      | 1.111 | 107.5 | 121.7  |

|     |                  |                                                       |       |       |        |
|-----|------------------|-------------------------------------------------------|-------|-------|--------|
|     | H <sub>ε1</sub>  | C <sub>ε</sub> , S <sub>δ</sub> , C <sub>γ</sub>      | 1.111 | 111.3 | 64.1   |
|     | H <sub>ε2</sub>  | C <sub>ε</sub> , H <sub>ε1</sub> , S <sub>δ</sub>     | 1.111 | 107.6 | 121.4  |
|     | H <sub>ε3</sub>  | C <sub>ε</sub> , H <sub>ε1</sub> , H <sub>ε2</sub>    | 1.111 | 107.0 | 115.4  |
| Phe | H <sub>β1</sub>  | C <sub>β</sub> , C <sub>γ</sub> , C <sub>α</sub>      | 1.111 | 108.1 | 121.1  |
|     | H <sub>β2</sub>  | C <sub>β</sub> , C <sub>α</sub> , C <sub>γ</sub>      | 1.111 | 108.6 | 119.5  |
|     | H <sub>δ1</sub>  | C <sub>δ1</sub> , C <sub>γ</sub> , C <sub>ε1</sub>    | 1.080 | 119.7 | 179.4  |
|     | H <sub>δ2</sub>  | C <sub>δ2</sub> , C <sub>γ</sub> , C <sub>ε2</sub>    | 1.080 | 120.2 | 179.1  |
|     | H <sub>ε1</sub>  | C <sub>ε1</sub> , C <sub>δ1</sub> , C <sub>ζ</sub>    | 1.080 | 119.3 | 179.5  |
|     | H <sub>ε2</sub>  | C <sub>ε2</sub> , C <sub>δ2</sub> , C <sub>ζ</sub>    | 1.080 | 119.7 | 179.1  |
|     | H <sub>ζ</sub>   | C <sub>ζ</sub> , C <sub>ε1</sub> , C <sub>ε2</sub>    | 1.080 | 120.5 | 179.5  |
| Pro | H <sub>β1</sub>  | C <sub>β</sub> , C <sub>γ</sub> , C <sub>α</sub>      | 1.111 | 111.8 | 119.5  |
|     | H <sub>β2</sub>  | C <sub>β</sub> , C <sub>α</sub> , C <sub>γ</sub>      | 1.111 | 111.3 | 118.7  |
|     | H <sub>γ1</sub>  | C <sub>γ</sub> , C <sub>β</sub> , C <sub>δ</sub>      | 1.111 | 112.7 | 119.9  |
|     | H <sub>γ2</sub>  | C <sub>γ</sub> , C <sub>δ</sub> , C <sub>β</sub>      | 1.111 | 111.2 | 118.8  |
|     | H <sub>δ1</sub>  | C <sub>δ</sub> , C <sub>γ</sub> , N                   | 1.111 | 109.9 | 117.8  |
|     | H <sub>δ2</sub>  | C <sub>δ</sub> , N, C <sub>γ</sub>                    | 1.111 | 111.5 | 119.3  |
| Ser | H <sub>β1</sub>  | C <sub>β</sub> , C <sub>α</sub> , O <sub>γ</sub>      | 1.111 | 109.7 | -119.5 |
|     | H <sub>β2</sub>  | C <sub>β</sub> , O <sub>γ</sub> , C <sub>α</sub>      | 1.111 | 107.7 | -121.5 |
|     | H <sub>γ1</sub>  | O <sub>γ</sub> , C <sub>β</sub> , C <sub>α</sub>      | 0.960 | 106.1 | 175.7  |
| Tyr | H <sub>β1</sub>  | C <sub>β</sub> , C <sub>γ</sub> , C <sub>α</sub>      | 1.111 | 107.7 | 121.6  |
|     | H <sub>β2</sub>  | C <sub>β</sub> , C <sub>α</sub> , C <sub>γ</sub>      | 1.111 | 110.3 | 119.6  |
|     | H <sub>δ1</sub>  | C <sub>δ1</sub> , C <sub>γ</sub> , C <sub>ε1</sub>    | 1.080 | 119.3 | -178.6 |
|     | H <sub>δ2</sub>  | C <sub>δ2</sub> , C <sub>γ</sub> , C <sub>ε2</sub>    | 1.080 | 120.1 | -176.9 |
|     | H <sub>ε1</sub>  | C <sub>ε1</sub> , C <sub>δ1</sub> , C <sub>ζ</sub>    | 1.080 | 119.1 | 179.3  |
|     | H <sub>ε2</sub>  | C <sub>ε2</sub> , C <sub>δ2</sub> , C <sub>ζ</sub>    | 1.080 | 119.5 | -179.6 |
|     | H <sub>η</sub>   | O <sub>η</sub> , C <sub>ζ</sub> , C <sub>ε2</sub>     | 0.960 | 106.7 | -178.7 |
| Thr | H <sub>β</sub>   | C <sub>β</sub> , C <sub>α</sub> , O <sub>γ1</sub>     | 1.111 | 110.0 | 121.2  |
|     | H <sub>γ1</sub>  | O <sub>γ1</sub> , C <sub>β</sub> , C <sub>α</sub>     | 0.960 | 104.5 | 70.0   |
|     | H <sub>γ21</sub> | C <sub>γ2</sub> , C <sub>β</sub> , C <sub>α</sub>     | 1.111 | 110.6 | 59.3   |
|     | H <sub>γ22</sub> | C <sub>γ2</sub> , H <sub>γ21</sub> , C <sub>β</sub>   | 1.111 | 108.4 | 122.2  |
|     | H <sub>γ23</sub> | C <sub>γ2</sub> , H <sub>γ21</sub> , H <sub>γ22</sub> | 1.111 | 107.3 | 115.5  |
| Trp | H <sub>β1</sub>  | C <sub>β</sub> , C <sub>γ</sub> , C <sub>α</sub>      | 1.111 | 108.1 | 121.5  |
|     | H <sub>β2</sub>  | C <sub>β</sub> , C <sub>α</sub> , C <sub>γ</sub>      | 1.111 | 107.8 | 121.1  |
|     | H <sub>δ1</sub>  | C <sub>δ1</sub> , N <sub>ε1</sub> , C <sub>γ</sub>    | 1.080 | 124.8 | -178.4 |
|     | H <sub>ζ2</sub>  | C <sub>ζ2</sub> , CH <sub>2</sub> , C <sub>ε2</sub>   | 1.080 | 121.0 | -179.3 |
|     | H <sub>η2</sub>  | CH <sub>2</sub> , C <sub>ζ3</sub> , C <sub>ζ2</sub>   | 1.080 | 120.3 | -179.8 |
|     | H <sub>ζ3</sub>  | C <sub>ζ3</sub> , C <sub>ε3</sub> , CH <sub>2</sub>   | 1.080 | 119.5 | -179.1 |
|     | H <sub>ε3</sub>  | C <sub>ε3</sub> , C <sub>δ2</sub> , C <sub>ζ3</sub>   | 1.080 | 121.0 | 179.1  |
| Val | H <sub>β</sub>   | C <sub>β</sub> , C <sub>γ1</sub> , C <sub>γ2</sub>    | 1.111 | 107.8 | -118.0 |
|     | H <sub>γ11</sub> | C <sub>γ1</sub> , C <sub>β</sub> , C <sub>α</sub>     | 1.111 | 111.6 | 57.3   |
|     | H <sub>γ12</sub> | C <sub>γ1</sub> , H <sub>γ11</sub> , C <sub>β</sub>   | 1.111 | 107.8 | 122.1  |
|     | H <sub>γ13</sub> | C <sub>γ1</sub> , H <sub>γ11</sub> , H <sub>γ12</sub> | 1.111 | 108.2 | 116.8  |
|     | H <sub>γ21</sub> | C <sub>γ2</sub> , C <sub>β</sub> , C <sub>α</sub>     | 1.111 | 110.8 | 58.5   |
|     | H <sub>γ22</sub> | C <sub>γ2</sub> , H <sub>γ21</sub> , C <sub>β</sub>   | 1.111 | 108.8 | 119.5  |
|     | H <sub>γ23</sub> | C <sub>γ2</sub> , H <sub>γ21</sub> , H <sub>γ22</sub> | 1.111 | 108.8 | 116.5  |

**Table S3:** Test set used for hydrogen reconstruction accuracy analysis with numbers of hydrogen atoms in different categories following Li et al.[4]. 6 structures were omitted from the original set of structures by Li et al. because of missing residues or atoms that complicate all-atom reconstruction from PRIMO.

|                            | Categories of hydrogen atoms |       |       |       |       |      |
|----------------------------|------------------------------|-------|-------|-------|-------|------|
| <i>X-ray</i>               | sp3H1                        | sp3H2 | sp3H3 | sp2H1 | sp2H2 | spH1 |
| 1abl                       | 99                           | 92    | 81    | 13    | 14    | 17   |
| 1g66                       | 416                          | 432   | 318   | 83    | 48    | 60   |
| 1gci                       | 567                          | 524   | 513   | 70    | 96    | 58   |
| 1m40                       | 590                          | 666   | 549   | 77    | 104   | 42   |
| 1muw                       | 839                          | 962   | 687   | 202   | 170   | 40   |
| 1ssx                       | 370                          | 332   | 324   | 55    | 76    | 40   |
| 1ucs                       | 143                          | 166   | 177   | 4     | 18    | 7    |
| 1vyr                       | 787                          | 898   | 678   | 138   | 160   | 53   |
| 1xvo                       | 471                          | 440   | 387   | 75    | 70    | 66   |
| 1yk4                       | 103                          | 156   | 69    | 24    | 6     | 10   |
| 2h5c                       | 370                          | 332   | 324   | 55    | 76    | 40   |
| 3pyp                       | 262                          | 324   | 222   | 75    | 30    | 18   |
| <i>Neutron diffraction</i> |                              |       |       |       |       |      |
| 1c57                       | 521                          | 534   | 453   | 119   | 62    | 57   |
| 1cq2                       | 334                          | 434   | 339   | 78    | 28    | 14   |
| 1xqn                       | 521                          | 534   | 453   | 119   | 62    | 57   |
| 1lzn                       | 281                          | 310   | 201   | 65    | 78    | 28   |
| 1ntp                       | 461                          | 500   | 393   | 81    | 48    | 65   |
| 2gve                       | 839                          | 988   | 660   | 207   | 182   | 37   |
| 1vcx                       | 104                          | 156   | 75    | 30    | 2     | 9    |
| 1io5                       | 281                          | 310   | 201   | 65    | 78    | 28   |
| 2mb5                       | 334                          | 434   | 339   | 78    | 28    | 14   |
| 5rsa                       | 268                          | 310   | 192   | 47    | 50    | 39   |

**Table S4:** Bond distances, angles, and dihedrals used in alternate PRIMO protein reconstructions as in Table S1.

| Residue | Constructed Atom | Constrained Atoms/ CG Sites                                                                                                   | Bond Length (Å) | Bond Angle (degree) | Dihedral (degree) |
|---------|------------------|-------------------------------------------------------------------------------------------------------------------------------|-----------------|---------------------|-------------------|
| Arg     | C <sub>γ</sub>   | C <sub>δ</sub> , C <sub>β</sub> , SC1                                                                                         | 1.53            | 33.10               | 0.0               |
| Asn     | O <sub>δ1</sub>  | C <sub>γ</sub> , C <sub>β</sub> , N <sub>δ2</sub>                                                                             | 1.24            | 121.40              | 179.45            |
|         | N <sub>δ2</sub>  | C <sub>γ</sub> , O <sub>δ1</sub> , C <sub>β</sub>                                                                             | 1.35            | 121.65              | 179.35            |
| Asp     | O <sub>δ1</sub>  | C <sub>γ</sub> , C <sub>β</sub> , SC2                                                                                         | 1.26            | 119.2               | 0.0               |
|         | O <sub>δ2</sub>  | C <sub>γ</sub> , C <sub>β</sub> , O <sub>δ1</sub>                                                                             | 1.26            | 118.7               | 180.0             |
| Cys     | S <sub>γ</sub>   | C <sub>β</sub> , C <sub>α</sub> , SC1                                                                                         | 1.83            | 112.95              | 0.0               |
| Gln     | C <sub>γ</sub>   | C <sub>β</sub> , C <sub>α</sub> , SC1                                                                                         | 1.55            | 114.2               | 0.0               |
|         | C <sub>δ</sub>   | C <sub>γ</sub> , C <sub>β</sub> , (SC2+SC3)/2                                                                                 | 1.53            | 111.9               | 0.0               |
|         | O <sub>ε1</sub>  | C <sub>δ</sub> , C <sub>γ</sub> , (C <sub>δ</sub> -SC2+SC3)                                                                   | 1.232           | 121.7               | 180.0             |
|         | N <sub>ε2</sub>  | C <sub>δ</sub> , C <sub>γ</sub> , O <sub>ε1</sub>                                                                             | 1.35            | 117.2               | 180.0             |
| Glu     | C <sub>γ</sub>   | C <sub>β</sub> , C <sub>α</sub> , SC1                                                                                         | 1.55            | 114.35              | 0.0               |
|         | C <sub>δ</sub>   | C <sub>γ</sub> , C <sub>β</sub> , (SC2+SC3)/2                                                                                 | 1.515           | 111.9               | 0.0               |
|         | O <sub>ε1</sub>  | C <sub>δ</sub> , C <sub>γ</sub> , (C <sub>δ</sub> -SC2+SC3+0.61*(C <sub>δ</sub> -C <sub>γ</sub> ) <sub>N</sub> ) <sup>a</sup> | 1.26            | 119.1               | 180.0             |
|         | O <sub>ε2</sub>  | C <sub>δ</sub> , C <sub>γ</sub> , O <sub>ε1</sub>                                                                             | 1.26            | 118.95              | 180.0             |
| His     | C <sub>γ</sub>   | C <sub>β</sub> , N <sub>δ1</sub> , SC1                                                                                        | 1.51            | 26.75               | 0.0               |
| Ile     | C <sub>δ</sub>   | C <sub>γ1</sub> , C <sub>β</sub> , SC2                                                                                        | 1.534           | 113.7               | 0.0               |
|         | C <sub>γ2</sub>  | C <sub>β</sub> , C <sub>α</sub> , SC1                                                                                         | 1.55            | 108.45              | 0.0               |
| Leu     | C <sub>δ1</sub>  | C <sub>γ</sub> , C <sub>β</sub> , SC2                                                                                         | 1.54            | 111.45              | 0.0               |
|         | C <sub>δ2</sub>  | C <sub>γ</sub> , C <sub>β</sub> , SC3                                                                                         | 1.54            | 111.10              | 0.0               |
| Lys     | C <sub>γ</sub>   | C <sub>δ</sub> , C <sub>β</sub> , SC1                                                                                         | 1.54            | 33.90               | 0.0               |
| Met     | C <sub>γ</sub>   | S <sub>δ</sub> , C <sub>β</sub> , SC1                                                                                         | 1.82            | 30.10               | 0.0               |
| Phe     | C <sub>γ</sub>   | C <sub>β</sub> , SC2, SC3                                                                                                     | 1.51            | 18.5                | 0.0               |
|         | C <sub>δ1</sub>  | C <sub>γ</sub> , C <sub>β</sub> , SC2                                                                                         | 1.41            | 120.3               | 0.0               |
|         | C <sub>δ2</sub>  | C <sub>γ</sub> , C <sub>β</sub> , SC3                                                                                         | 1.41            | 120.2               | 0.0               |
|         | C <sub>ε1</sub>  | C <sub>δ1</sub> , C <sub>γ</sub> , C <sub>β</sub>                                                                             | 1.40            | 120.7               | 180.0             |
|         | C <sub>ε2</sub>  | C <sub>δ2</sub> , C <sub>γ</sub> , C <sub>β</sub>                                                                             | 1.40            | 120.95              | 180.0             |
| Tyr     | C <sub>γ</sub>   | C <sub>β</sub> , SC2, SC3                                                                                                     | 1.51            | 18.5                | 0.0               |
|         | C <sub>δ1</sub>  | C <sub>γ</sub> , C <sub>β</sub> , SC2                                                                                         | 1.41            | 120.45              | 0.0               |
|         | C <sub>δ2</sub>  | C <sub>γ</sub> , C <sub>β</sub> , SC3                                                                                         | 1.41            | 120.45              | 0.0               |
|         | C <sub>ε1</sub>  | C <sub>δ1</sub> , C <sub>γ</sub> , C <sub>β</sub>                                                                             | 1.40            | 120.35              | 180.0             |
|         | C <sub>ε2</sub>  | C <sub>δ2</sub> , C <sub>γ</sub> , C <sub>β</sub>                                                                             | 1.40            | 120.45              | 180.0             |
|         | C <sub>ζ</sub>   | C <sub>ε1</sub> , C <sub>δ2</sub> , C <sub>γ</sub>                                                                            | 1.40            | 119.65              | 1.0               |
|         | O <sub>η</sub>   | C <sub>ζ</sub> , C <sub>ε2</sub> , C <sub>ε2</sub>                                                                            | 1.41            | 119.85              | 180.0             |
| Pro     | C <sub>γ</sub>   | C <sub>β</sub> , C <sub>δ</sub> , SC1                                                                                         | 1.53            | 38.75               | 0.0               |
| Ser     | O <sub>γ</sub>   | C <sub>β</sub> , C <sub>α</sub> , SC1                                                                                         | 1.427           | 112.15              | 0.0               |

|     |                |                                   |       |        |      |
|-----|----------------|-----------------------------------|-------|--------|------|
| Thr | $O_{\gamma 1}$ | $C_{\beta}, C_{\alpha}, SC1$      | 1.42  | 111.7  | 0.0  |
|     | $C_{\gamma 2}$ | $C_{\beta}, C_{\alpha}, SC2$      | 1.54  | 110.45 | 0.0  |
| Trp | $C_{\gamma}$   | $SC1, C_{\delta 1}, C_{\delta 2}$ | 0.755 | 35.75  | -0.3 |
| Val | $C_{\gamma 1}$ | $C_{\beta}, C_{\alpha}, SC1$      | 1.54  | 110.55 | 0.0  |
|     | $C_{\gamma 2}$ | $C_{\beta}, C_{\alpha}, SC2$      | 1.54  | 110.8  | 0.0  |

*a.* The subscripted N denotes the corresponding unit vector.



**Table S5:** Reconstruction accuracy (RMSD) for heavy atoms with alternative reconstruction protocol before and after minimization with CHARMM (see caption of Table 5 for details). Standard deviations are given in parentheses.

|            | Alt.         | Alt/Min      |
|------------|--------------|--------------|
| ALL        | 0.099(0.031) | 0.101(0.030) |
| Backbone   | 0.022(0.021) | 0.034(0.019) |
| Side-Chain | 0.138(0.044) | 0.139(0.044) |
| ARG        | 0.042(0.026) | 0.046(0.026) |
| ASN        | 0.038(0.017) | 0.044(0.022) |
| ASP        | 0.025(0.015) | 0.030(0.020) |
| CYS        | 0.128(0.083) | 0.188(0.109) |
| GLN        | 0.212(0.143) | 0.210(0.140) |
| GLU        | 0.293(0.120) | 0.288(0.117) |
| HIS        | 0.063(0.035) | 0.055(0.030) |
| ILE        | 0.196(0.186) | 0.191(0.182) |
| LEU        | 0.043(0.017) | 0.044(0.020) |
| LYS        | 0.050(0.031) | 0.031(0.029) |
| MET        | 0.061(0.032) | 0.058(0.037) |
| PHE        | 0.105(0.067) | 0.100(0.064) |
| PRO        | 0.096(0.047) | 0.093(0.048) |
| SER        | 0.144(0.072) | 0.144(0.074) |
| THR        | 0.051(0.022) | 0.049(0.027) |
| TRP        | 0.046(0.016) | 0.042(0.015) |
| TYR        | 0.102(0.070) | 0.100(0.071) |
| VAL        | 0.036(0.027) | 0.038(0.027) |

**Table S6:** Reconstruction accuracy (RMSD) for hydrogen atoms with alternative reconstruction protocol before and after minimization with CHARMM (see caption of Table 5 for details). Standard deviations are given in parentheses.

|             | Alt           | Alt/Min       |
|-------------|---------------|---------------|
| All/Average | 0.201 (0.218) | 0.199 (0.217) |
| sp3H3       | 0.253 (0.212) | 0.250 (0.210) |
| sp3H2       | 0.195 (0.160) | 0.193 (0.158) |
| sp3H1       | 0.116 (0.078) | 0.113 (0.078) |
| sp2H2       | 0.212 (0.223) | 0.212 (0.223) |
| sp2H1       | 0.155 (0.070) | 0.150 (0.068) |
| spH1        | 1.044 (0.597) | 1.045 (0.598) |

**Figure S1.** Correlation between  $C_{\alpha}$ -SC2 and  $C_{\alpha}$ - $C_{\beta}$  bond lengths. The blue points represent averages where data is present and extrapolated values based on the trends at either side of the data range.

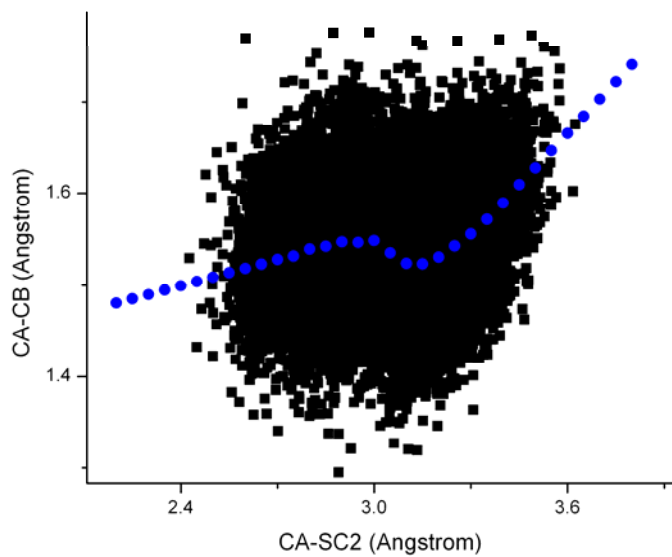

**Figure S2.** Correlation between  $C_{\alpha}$ -SC2 and  $C_{\alpha}$ - $C_{\gamma 1}$  bond lengths as in Fig. S1.

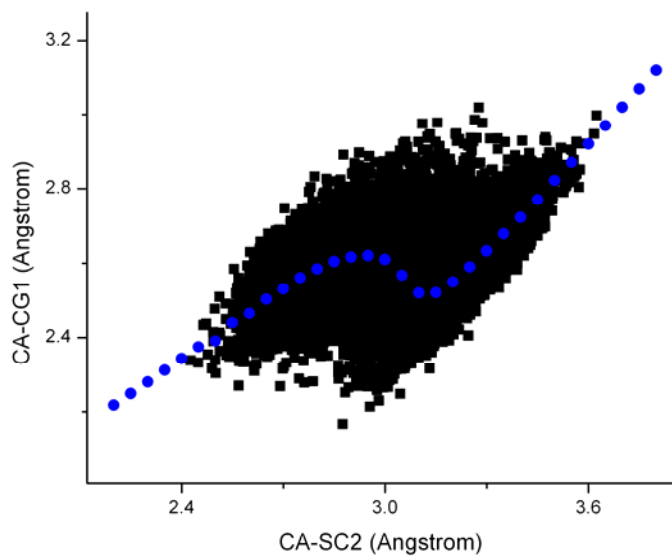

**Figure S3.** Correlation between  $C_{\alpha}$ -SC2 bond lengths and  $C_{\alpha}$ -C $_{\beta}$ -C $_{\gamma 1}$  bond angles as in Figure S1.

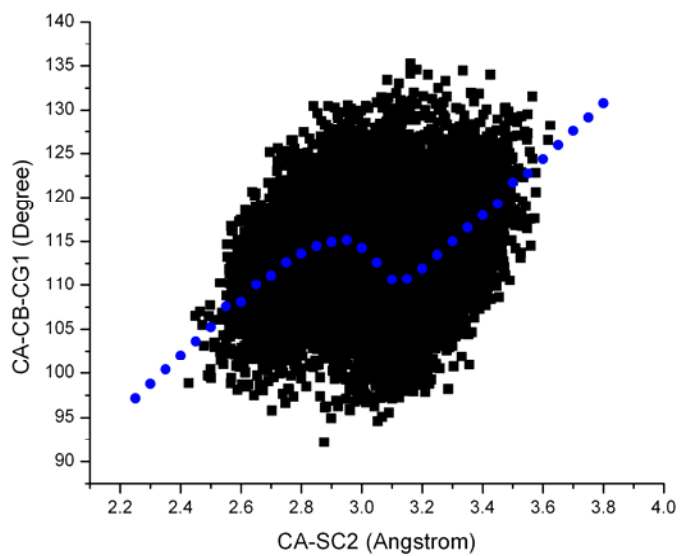

**Figure S4.** Correlation between  $C_{\alpha}$ -SC2 and  $C_{\beta}$ -SC2 bond lengths as in Figure S1.

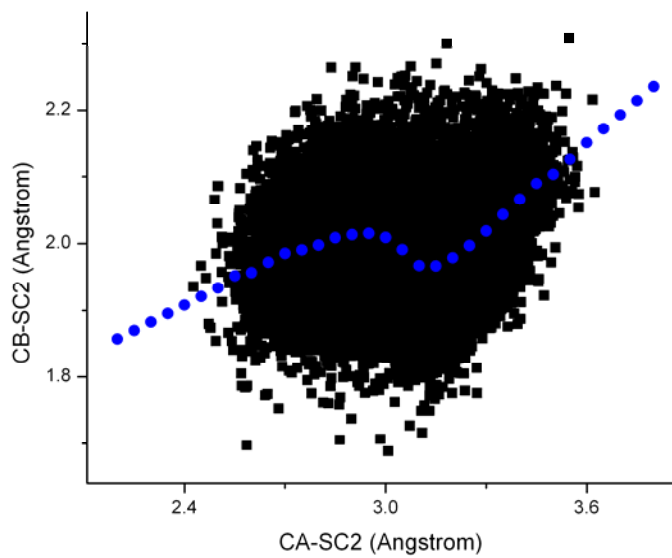

**Figure S5.** Correlation between SC1-SC2 and SC1-C<sub>γ1</sub> bond lengths as in Figure S1.

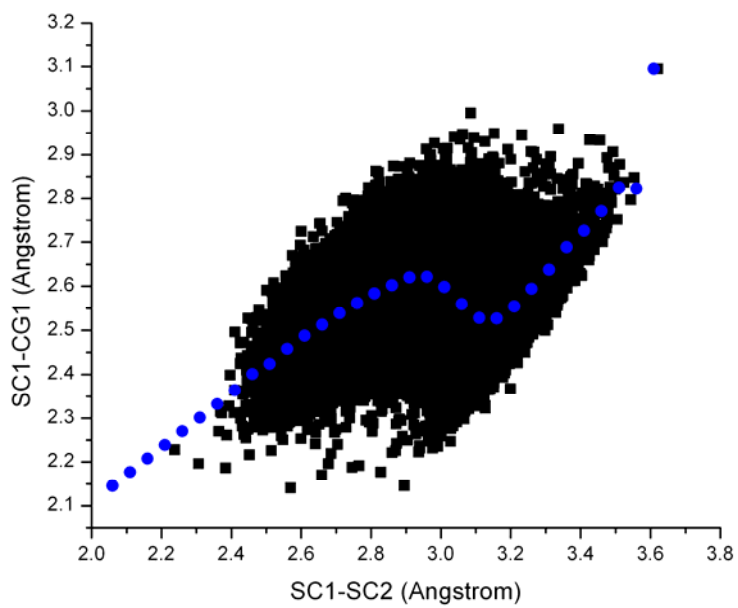

**Figure S6.** Correlation between  $C_\alpha$ -SC2-SC1 and  $C_\alpha$ -C $_\beta$ -SC1 bond angles as in Figure S1.

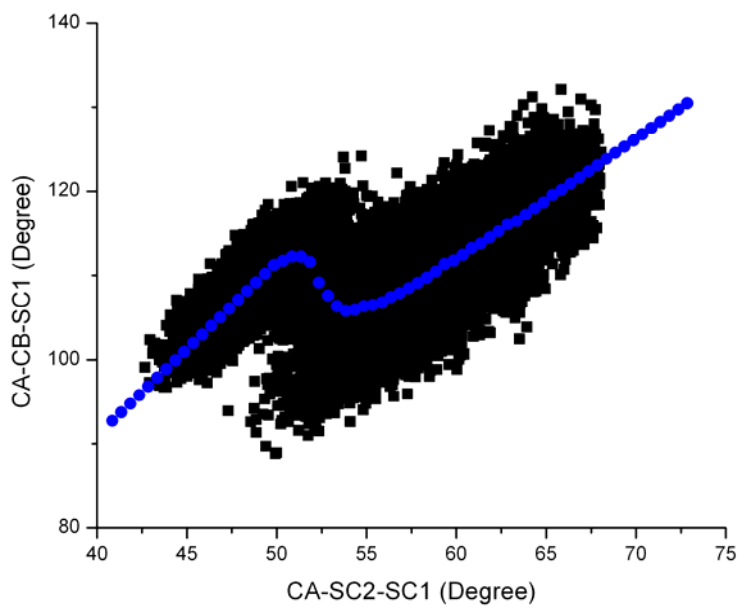



## References

- [1] Gopal, S.M., Mukherjee, S., Cheng, Y.M., Feig, M. PRIMO/PRIMONA: a coarse-grained model for proteins and nucleic acids that preserves near-atomistic accuracy. *Proteins*. 2010, 78, 1266-81.
- [2] MacKerell, A.D., Bashford, D., Bellott, Dunbrack, R.L., Evanseck, J.D., Field, M.J., et al. All-Atom Empirical Potential for Molecular Modeling and Dynamics Studies of Proteins†. *The Journal of Physical Chemistry B*. 1998, 102, 3586-616.
- [3] MacKerell, A.D., Feig, M., Brooks, C.L. Improved Treatment of the Protein Backbone in Empirical Force Fields. *Journal of the American Chemical Society*. 2004, 126, 698-9.
- [4] Li, Y., Roy, A., Zhang, Y. HAAD: A quick algorithm for accurate prediction of hydrogen atoms in protein structures. *PLoS One*. 2009, 4, e6701.
